# Supplementary material for: Impact of Lytic Phages on Phosphorus- vs. Nitrogen-Limited Marine Microbes
Source: PubMed Central journal article supplement (PMC7047511; doi:10.3389/fmicb.2020.00221), 2020-02-21
Supplement: Data_Sheet_1.pdf [file Data_Sheet_1.pdf]

# Impact of lytic phages on phosphorus- versus nitrogen-limited marine microbes

Julie Pourtois<sup>1,2</sup>, Corina E. Tarnita<sup>1</sup>, and Juan A. Bonachela<sup>3,\*</sup>

<sup>1</sup>Department of Ecology and Evolutionary Biology, Princeton University, Princeton, NJ 08544, USA

<sup>2</sup>Department of Biology, Stanford University, Stanford, CA 94305, USA

<sup>3</sup>Department of Ecology, Evolution, and Natural Resources, Rutgers University, New Brunswick, NJ 08901, USA

\* To whom correspondence should be addressed: [juan.bonachela@rutgers.edu](mailto:juan.bonachela@rutgers.edu)

## Appendix A

### *Nitrogen-limited system*

$$\frac{dH}{dt} = \frac{\overbrace{r_H H N_{org}}^{N_{org} \text{ uptake}}}{K_{org} + N_{org}} - \overbrace{\phi_H H V_H}^{\text{lysis}} - \overbrace{\gamma_H H Z}^{\text{grazing}} - \overbrace{\lambda_H H}^{\text{respiration}} - \overbrace{\sigma_H H}^{\text{organic loss}} \quad (\text{A1})$$

$$\frac{dC}{dt} = \frac{\overbrace{r_C C N_{in}}^{N_{in} \text{ uptake}}}{K_{in} + N_{in}} - \overbrace{\phi_C C V_C}^{\text{lysis}} - \overbrace{\gamma_C C Z}^{\text{grazing}} - \overbrace{\lambda_C C}^{\text{respiration}} - \overbrace{\sigma_C C}^{\text{organic loss}} \quad (\text{A2})$$

$$\frac{dZ}{dt} = \frac{\overbrace{p_g Z (b_H \gamma_H H + b_C \gamma_C C)}^{\text{grazing}}}{b_Z} - \overbrace{\lambda_Z Z}^{\text{respiration}} - \overbrace{\gamma_Z Z^2}^{\text{predation}} \quad (\text{A3})$$

$$\frac{dV_H}{dt} = \overbrace{\beta_H \phi_H H V_H}^{\text{lysis}} - \overbrace{\theta_H V_H}^{\text{decay}} \quad (\text{A4})$$

$$\frac{dV_C}{dt} = \overbrace{\beta_C \phi_C C V_C}^{\text{lysis}} - \overbrace{\theta_C V_C}^{\text{decay}} \quad (\text{A5})$$

$$\begin{aligned} \frac{dN_{in}}{dt} = & \overbrace{-\omega(N_{in} - N_{sub})}^{\text{exchange}} + \overbrace{\frac{b_H(1 - \epsilon_H)r_H H N_{org}}{\epsilon_H(K_{org} + N_{org})}}^{\text{H uptake}} - \overbrace{\frac{b_C r_C C N_{in}}{K_{in} + N_{in}}}_{\text{C uptake}} + \overbrace{b_Z \lambda_Z Z}_{\text{Z respiration}} \\ & + \overbrace{b_H \lambda_H H}^{\text{H respiration}} + \overbrace{b_C \lambda_C C}^{\text{H respiration}} + \overbrace{Z(1 - p_g - p_{ex})(b_H \gamma_H H + b_C \gamma_C C)}^{\text{grazing}} \end{aligned} \quad (\text{A6})$$

$$\begin{aligned} \frac{dN_{org}}{dt} = & -\overbrace{\frac{b_H r_H H N_{org}}{\epsilon_H(K_{org} + N_{org})}}^{\text{H uptake}} + \overbrace{\frac{V_H}{b_V \theta_H V_H}}^{\text{V}_H \text{ decay}} + \overbrace{\frac{V_C}{b_V \theta_C V_C}}^{\text{V}_C \text{ decay}} + \overbrace{(b_H - b_V \beta_H) \phi_H H V_H}_{\text{H lysis}} \\ & + \overbrace{(b_C - b_V \beta_C) \phi_C C V_C}_{\text{C lysis}} + \overbrace{b_H \sigma_H H}_{\text{H organic loss}} + \overbrace{b_C \sigma_C C}_{\text{C organic loss}} \\ & + \overbrace{p_{ex} Z (b_H \gamma_H H + b_C \gamma_C C)}^{\text{grazing}} \end{aligned} \quad (\text{A7})$$

*Phosphorus-limited system*

$$\frac{dH}{dt} = \overbrace{\frac{r_H H P_{in}}{K_{H,in} + P_{in}}}_{\text{P}_{in} \text{ uptake}} - \overbrace{\phi_H H V_H}_{\text{lysis}} - \overbrace{\gamma_H H Z}_{\text{grazing}} - \overbrace{\lambda_H H}_{\text{respiration}} - \overbrace{\sigma_H H}_{\text{organic loss}} \quad (\text{A8})$$

$$\frac{dC}{dt} = \overbrace{\frac{r_C C P_{in}}{K_{C,in} + P_{in}}}_{\text{P}_{in} \text{ uptake}} - \overbrace{\phi_C C V_C}_{\text{lysis}} - \overbrace{\gamma_C C Z}_{\text{grazing}} - \overbrace{\lambda_C C}_{\text{respiration}} - \overbrace{\sigma_C C}_{\text{organic loss}} \quad (\text{A9})$$

$$\frac{dZ}{dt} = \overbrace{\frac{p_g Z (q_H \gamma_H H + q_C \gamma_C C)}{q_Z}}^{\text{grazing}} - \overbrace{\lambda_Z Z}_{\text{respiration}} - \overbrace{\gamma_Z Z^2}_{\text{predation}} \quad (\text{A10})$$

$$\frac{dV_H}{dt} = \overbrace{\beta_H \phi_H H V_H}_{\text{lysis}} - \overbrace{\theta_H V_H}_{\text{decay}} \quad (\text{A11})$$

$$\frac{dV_C}{dt} = \overbrace{\beta_C \phi_C C V_C}^{\text{lysis}} - \overbrace{\theta_C V_C}^{\text{decay}} \quad (\text{A12})$$

$$\begin{aligned} \frac{dP_{in}}{dt} = & - \overbrace{\omega(P_{in} - P_{sub})}^{\text{exchange}} - \overbrace{\frac{q_H r_H H P_{in}}{K_{H,in} + P_{in}}}^{\text{H uptake}} - \overbrace{\frac{q_C r_C C P_{in}}{K_{C,in} + P_{in}}}^{\text{C uptake}} + \overbrace{q_Z \lambda_Z Z}^{\text{Z respiration}} + \overbrace{q_H \lambda_H H}^{\text{H respiration}} \\ & + \overbrace{q_C \lambda_C C}^{\text{C respiration}} + \overbrace{(1 - p_g - p_{ex})(q_H \gamma_H H Z + q_C \gamma_C C Z)}^{\text{grazing}} + \overbrace{\psi_H H P_{org}}^{\text{remineralization}} \\ & + \overbrace{\psi_C C P_{org}}^{\text{remineralization}} \end{aligned} \quad (\text{A13})$$

$$\begin{aligned} \frac{dP_{org}}{dt} = & \overbrace{\frac{V_H}{q_V \theta_H V_H}}^{\text{V}_H \text{ decay}} + \overbrace{\frac{V_C}{q_V \theta_C V_C}}^{\text{V}_C \text{ decay}} + \overbrace{(q_H - q_V \beta_H) \phi_H H V_H}^{\text{H lysis}} + \overbrace{(q_C - q_V \beta_C) \phi_C C V_C}^{\text{C lysis}} \\ & + \overbrace{q_H \sigma_H H}^{\text{H organic loss}} + \overbrace{q_C \sigma_C C}^{\text{C organic loss}} + \overbrace{p_{ex} Z (q_H \gamma_H H + q_C \gamma_C C)}^{\text{grazing}} \\ & - \overbrace{\psi_H H P_{org}}^{\text{remineralization}} - \overbrace{\psi_C C P_{org}}^{\text{remineralization}} \end{aligned} \quad (\text{A14})$$

### Fluxes

The equations below provide expressions for productivity (P), nutrient release (NR), nutrient export to higher trophic levels (NE), and carbon sink (CS), for the N-limited systems. The equations for the P-limited systems are similar, and just require replacing the N-specific parameters with their phosphorus equivalent (e.g.  $b_H \leftrightarrow q_H$ ,  $b_{C:N} \leftrightarrow b_{C:P}$ , etc).

$$P = \frac{b_H r_H H N_{org}}{K_{org} + N_{org}} + \frac{b_C r_C C N_{in}}{K_{in} + N_{in}} \quad (\text{A15})$$

$$NR = (b_H - b_V \beta_H) \phi_H H V_H + (b_C - b_V \beta_C) \phi_C C V_C + p_{ex} Z (b_H \gamma_H H + b_C \gamma_C C) \quad (\text{A16})$$

$$NE = b_Z \gamma_Z Z^2 \quad (\text{A17})$$

$$\begin{aligned} CS = & b_Z \gamma_Z Z^2 p_{fzC:N} + (b_H b_{C:N} - b_V v_{C:N} \beta_H) \phi_H H V_H p_{rec} \\ & + (b_C b_{C:N} - b_V v_{C:N} \beta_C) \phi_C C V_C p_{rec} \end{aligned} \quad (\text{A18})$$

## Appendix B

Equilibrium expressions

*N-limited, with viruses*

$$H = \frac{\theta_H}{\beta_H \phi_H} \quad (\text{B1})$$

$$C = \frac{\theta_C}{\beta_C \phi_C} \quad (\text{B2})$$

$$Z = \frac{p_g(b_H \gamma_H H + b_C \gamma_C C)}{b_Z \gamma_Z} - \frac{\lambda_Z}{\gamma_Z} \quad (\text{B3})$$

$$N_{in} = N_{sub} - \frac{b_Z \gamma_Z Z^2}{\omega} \quad (\text{B4})$$

$$V_C = \frac{r_C N_{in}}{\phi_C (N_{in} + K_{in})} - \frac{\lambda_C}{\phi_C} - \frac{\sigma_C}{\phi_C} - \frac{\gamma_C Z}{\phi_C} \quad (\text{B5})$$

$$V_H = \frac{x}{y} \quad (\text{B6})$$

where:

$$x = -\frac{b_H H (\gamma_H Z + \lambda_H + \sigma_H)}{\epsilon_H} + b_V \theta_C V_C + (b_C - b_V \beta_C) \phi_{VC} C V_C + p_{ex} b_H \gamma_H H Z + p_{ex} b_C \gamma_C C Z + b_H \sigma_H H + b_C \sigma_C C \quad (\text{B7})$$

$$y = \frac{b_H \phi_{V_H} H}{\epsilon_H} - b_V \theta_H - (b_H - b_V \beta_H) \phi_{V_H} H \quad (\text{B8})$$

$$N_{org} = \frac{K_{org} (\phi_{V_H} V_H + \gamma_H Z + \lambda_H + \sigma_H)}{r_H - \phi_{V_H} V_H - \gamma_H Z - \lambda_H - \sigma_H} \quad (\text{B9})$$

*N-limited, without viruses*

We find the equilibrium expression for  $Z$  by solving a polynomial of the third degree of the form  $C_3Z^3 + C_2Z^2 + C_1Z + C_0 = 0$  where:

$$C_3 = \frac{\gamma_C b_Z \gamma_Z}{\omega} \quad (\text{B10})$$

$$C_2 = -\frac{b_Z \gamma_Z (r_C - \lambda_C - \sigma_C)}{\omega} \quad (\text{B11})$$

$$C_1 = -K_{in} \gamma_C - N_{sub} \gamma_C \quad (\text{B12})$$

$$C_0 = N_{sub} (r_C - \lambda_C - \sigma_C) - K_{in} (\lambda_C + \sigma_C) \quad (\text{B13})$$

We solved for  $Z$  numerically. We then found the equilibrium expressions of the remaining variables.

$$N_{in} = N_{sub} - \frac{b_Z \gamma_Z Z^2}{\omega} \quad (\text{B14})$$

$$N_{org} = \frac{K_{org} (\gamma_H Z + \lambda_H + \sigma_H)}{r_H - \gamma_H Z - \lambda_H - \sigma_H} \quad (\text{B15})$$

$$H = \frac{\sigma_C b_Z (\lambda_Z + \gamma_Z Z) + p_{ex} b_Z Z \gamma_C (\lambda_Z + \gamma_Z Z)}{p_G \gamma_C \left( \frac{b_H r_H N_{org}}{\epsilon_H (K_{org} + N_{org})} - b_H \sigma_H + \frac{\sigma_C b_H \gamma_H}{\gamma_C} \right)} \quad (\text{B16})$$

$$C = \frac{b_Z (\lambda_Z + \gamma_Z Z)}{p_G b_C \gamma_C} - \frac{b_H \gamma_H H}{b_C \gamma_C} \quad (\text{B17})$$

*P-limited, with viruses*

$$H = \frac{\theta_H}{\beta_H \phi_H} \quad (\text{B18})$$

$$C = \frac{\theta_C}{\beta_C \phi_C} \quad (\text{B19})$$

$$Z = \frac{p_g(q_H \gamma_H H + q_C \gamma_C C)}{q_Z \gamma_Z} - \frac{\lambda_Z}{\gamma_Z} \quad (\text{B20})$$

$$P_{in} = P_{sub} - \frac{q_Z \gamma_Z Z^2}{\omega} \quad (\text{B21})$$

$$V_H = \frac{r_H P_{in}}{\phi_H (P_{in} + K_{H,in})} - \frac{\lambda_H}{\phi_H} - \frac{\sigma_H}{\phi_H} - \frac{\gamma_H Z}{\phi_H} \quad (\text{B22})$$

$$V_C = \frac{r_C P_{in}}{\phi_C (P_{in} + K_{C,in})} - \frac{\lambda_C}{\phi_C} - \frac{\sigma_C}{\phi_C} - \frac{\gamma_C Z}{\phi_C} \quad (\text{B23})$$

$$P_{org} = \frac{q_H \sigma_H H + q_C \sigma_C C + p_{ex} Z (\gamma_H q_H H + \gamma_C q_C C) + \theta_H V_H q_V + \theta_C V_C q_V}{\psi_H H + \psi_C C} + \frac{(q_H - \beta_H q_V) \phi_H V_H H + (q_C - \beta_C q_V) \phi_C V_C C}{\psi_H H + \psi_C C} \quad (\text{B24})$$

*P*-limited, without viruses

We find the equilibrium expression for  $Z$  by solving a polynomial of the third degree of the form  $C_3 Z^3 + C_2 Z^2 + C_1 Z + C_0 = 0$  where:

$$\xi = q_Z \gamma_Z \omega \quad (\text{B25})$$

$$C_3 = -\gamma_H \xi \quad (\text{B26})$$

$$C_2 = \xi (r_H - \lambda_H - \sigma_H) \quad (\text{B27})$$

$$C_1 = \gamma_H (P_{sub} + K_{H,in}) \quad (\text{B28})$$

$$C_0 = \lambda_H P_{sub} + \lambda_H K_{H,in} + \sigma_H P_{sub} + \sigma_H K_{H,in} - r_H P_{sub} \quad (\text{B29})$$

We solved for  $Z$  numerically. We then found the equilibrium expressions of the remaining variables.

$$P_{org} = \frac{q_H \sigma_H}{\psi_H} + \frac{p_{ex} \gamma_H q_H Z}{\psi_H} \quad (\text{B30})$$

$$H = \frac{q_Z (\lambda_Z + \gamma_Z Z)}{p_g q_H \gamma_H} \quad (\text{B31})$$

$$P_{in} = P_{sub} - \frac{q_Z \gamma_Z Z^2}{\omega} = P_{sub} - \xi Z^2 \quad (\text{B32})$$

## Appendix C

Table C-1. Parameter ranges.

| Process                    | Symbol       | Meaning                                   | Minimum               | Maximum             | Units                      |
|----------------------------|--------------|-------------------------------------------|-----------------------|---------------------|----------------------------|
| H nutrient uptake          | $r_H$        | Maximum growth rate                       | 0.5                   | 5                   | day <sup>-1</sup>          |
|                            | $q_H$        | H phosphorus content                      | $10^{-11}$            | $5 \times 10^{-10}$ | μmol P/cell                |
|                            | $b_H$        | H nitrogen content                        | $5 \times 10^{-10}$   | $4 \times 10^{-9}$  | μmol N/cell                |
|                            | $K_{H,in}$   | P <sub>in</sub> Half-saturation constant  | 0.005                 | 1.5                 | μmol P                     |
|                            | $K_{org}$    | N <sub>org</sub> Half-saturation constant | 0.25                  | 1                   | μmol N/L                   |
|                            | $\epsilon_H$ | Efficiency                                | 0.05                  | 0.2                 | NA                         |
|                            | $\psi_H$     | Phosphatase rate                          | $2 \times 10^{-13}$   | $2 \times 10^{-10}$ | (cell × day) <sup>-1</sup> |
| C nutrient uptake          | $r_C$        | Maximum growth rate                       | 0.1                   | 1.5                 | day <sup>-1</sup>          |
|                            | $q_C$        | C phosphorus content                      | $3 \times 10^{-11}$   | $2 \times 10^{-10}$ | μmol P/cell                |
|                            | $b_C$        | C nitrogen content                        | $5 \times 10^{-10}$   | $4 \times 10^{-9}$  | μmol N/cell                |
|                            | $K_{C,in}$   | P <sub>in</sub> Half-saturation constant  | 0.005                 | 1.5                 | μmol P                     |
|                            | $K_{in}$     | N <sub>in</sub> Half-saturation constant  | 0.05                  | 1                   | μmol N/L                   |
|                            | $\psi_C$     | Phosphatase rate                          | $2 \times 10^{-13}$   | $2 \times 10^{-10}$ | (cell × day) <sup>-1</sup> |
| Respiration                | $\lambda_H$  | H respiration rate                        | 0.005                 | 0.05                | day <sup>-1</sup>          |
|                            | $\lambda_C$  | C respiration rate                        | 0.0005                | 0.005               | day <sup>-1</sup>          |
|                            | $\lambda_Z$  | Z respiration rate                        | 0.0005                | 0.01                | day <sup>-1</sup>          |
| Cellular loss              | $\sigma_H$   | H exudation rate                          | 0.0015                | 0.003               | day <sup>-1</sup>          |
|                            | $\sigma_C$   | C exudation rate                          | 0.0005                | 0.0015              | day <sup>-1</sup>          |
| Zooplankton                | $\gamma_H$   | H grazing rate                            | $10^{-6}$             | $10^{-4}$           | L/(cell × day)             |
|                            | $\gamma_C$   | C grazing rate                            | $10^{-6}$             | $10^{-4}$           | L/(cell × day)             |
|                            | $p_g$        | Growth efficiency                         | 0.2                   | 0.4                 | NA                         |
|                            | $p_{ex}$     | Fraction excreted                         | 0.2                   | 0.4                 | NA                         |
|                            | $q_Z$        | Z phosphorus content                      | $10^{-6}$             | $2 \times 10^{-5}$  | μmol P/zoopl.              |
|                            | $b_Z$        | Z nitrogen content                        | $5 \times 10^{-5}$    | $4 \times 10^{-4}$  | μmol N/zoopl.              |
| Viral lysis                | $\phi_H$     | H lysis rate                              | $10^{-13}$            | $10^{-10}$          | L/(virus × day)            |
|                            | $\phi_C$     | C lysis rate                              | $10^{-13}$            | $10^{-10}$          | L/(virus × day)            |
|                            | $\beta_H$    | H burst size                              | 15                    | 50                  | NA                         |
|                            | $\beta_C$    | C burst size                              | 20                    | 150                 | NA                         |
|                            | $q_v$        | V phosphorus content                      | $0.5 \times 10^{-13}$ | $2 \times 10^{-13}$ | μmol P/virus               |
|                            | $b_v$        | V nitrogen content                        | $0.5 \times 10^{-12}$ | $3 \times 10^{-12}$ | μmol N/virus               |
| Viral decay                | $\theta_H$   | V <sub>H</sub> decay rate                 | 0.05                  | 1                   | day <sup>-1</sup>          |
|                            | $\theta_C$   | V <sub>C</sub> decay rate                 | 0.05                  | 1                   | day <sup>-1</sup>          |
| Nutrient import and export | $\gamma_Z$   | Consumption of Z (P)                      | $10^{-6}$             | $10^{-3}$           | L/(zoopl. × day)           |
|                            | $\gamma_Z$   | Consumption of Z (N)                      | $10^{-8}$             | $10^{-4}$           | L/(zoopl. × day)           |
|                            | $p_f$        | Fraction sink                             | 0.05                  | 0.3                 | NA                         |
|                            | $z_{C:N}$    | C:N zooplankton ratio                     | 4                     | 8                   | NA                         |
|                            | $z_{C:P}$    | C:P zooplankton ratio                     | 60                    | 200                 | NA                         |
|                            | $b_{C:N}$    | C:N bacteria ratio                        | 4                     | 7                   | NA                         |
|                            | $b_{C:P}$    | C:P bacteria ratio                        | 64                    | 112                 | NA                         |
|                            | $v_{C:N}$    | C:N virus ratio                           | 3                     | 3.5                 | NA                         |



|           |                                    |       |      |                   |
|-----------|------------------------------------|-------|------|-------------------|
| $v_{C:P}$ | C:P virus ratio                    | 18    | 45   | NA                |
| $p_{rec}$ | Fraction DOC refractory            | 0.1   | 0.3  | NA                |
| $\omega$  | Mixing rate                        | 0.005 | 0.02 | day <sup>-1</sup> |
| $P_{sub}$ | P <sub>in</sub> in sublevel waters | 0.05  | 0.2  | μmol P/L          |
| $N_{sub}$ | N <sub>in</sub> in sublevel waters | 2.5   | 10   | μmol N/L          |
| $N$       | Total phosphorus pool              | 0.08  | 0.18 | μmol P/L          |

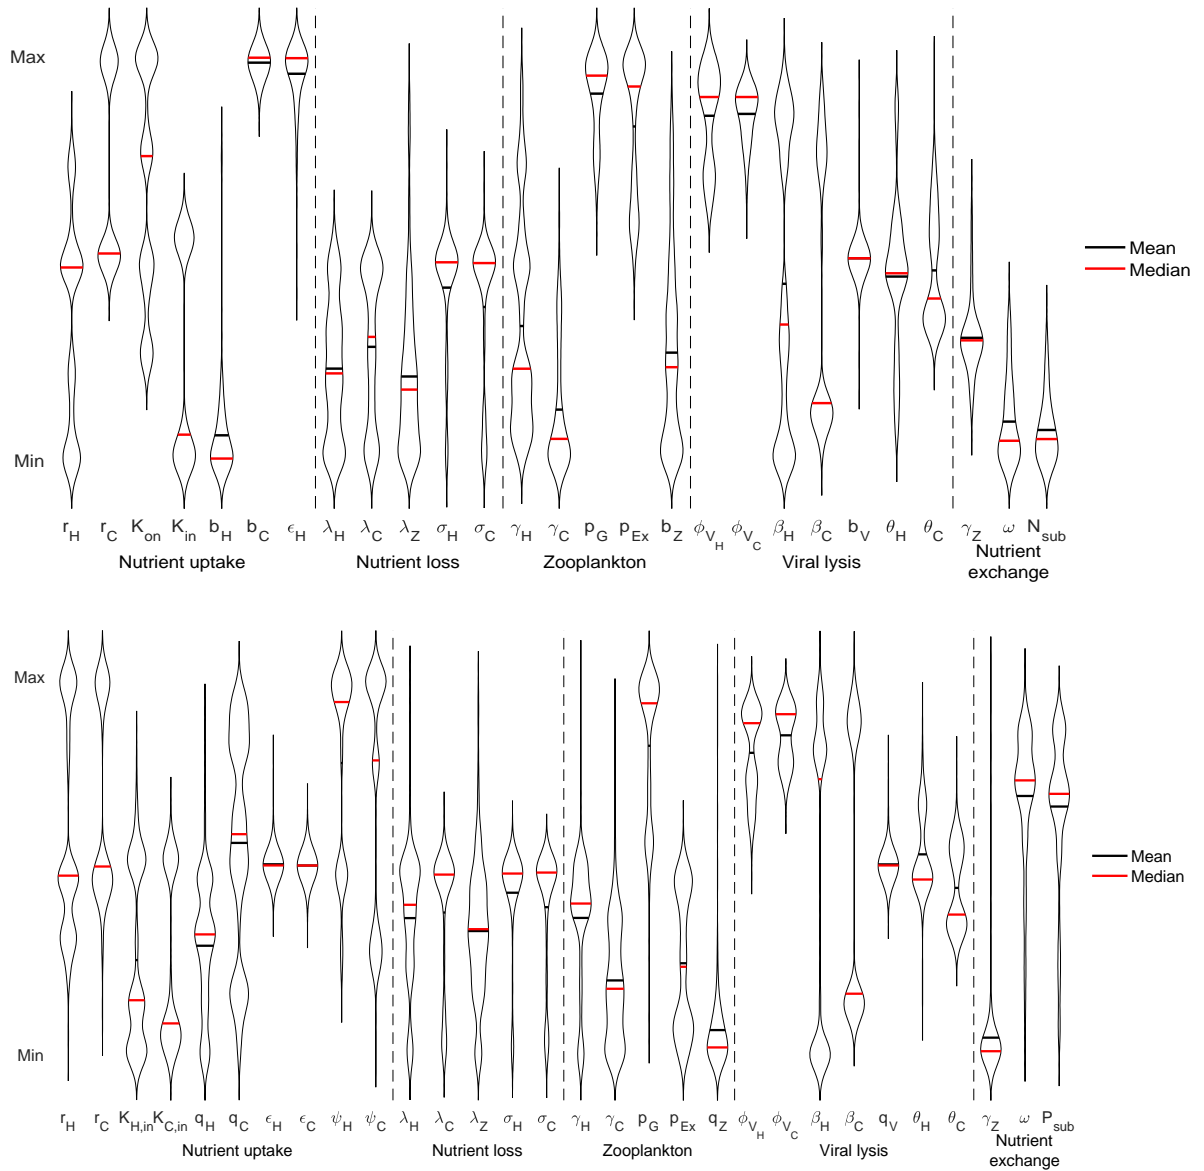

Figure C-1. Distribution of optimized parameters in log-space. Top: Nitrogen-limited system. Bottom: Phosphorus-limited system. Parameters in log-space were standardized by subtracting the minimum of the range and then dividing by the range. Parameters are arranged according to the processes they relate to.

## Appendix D

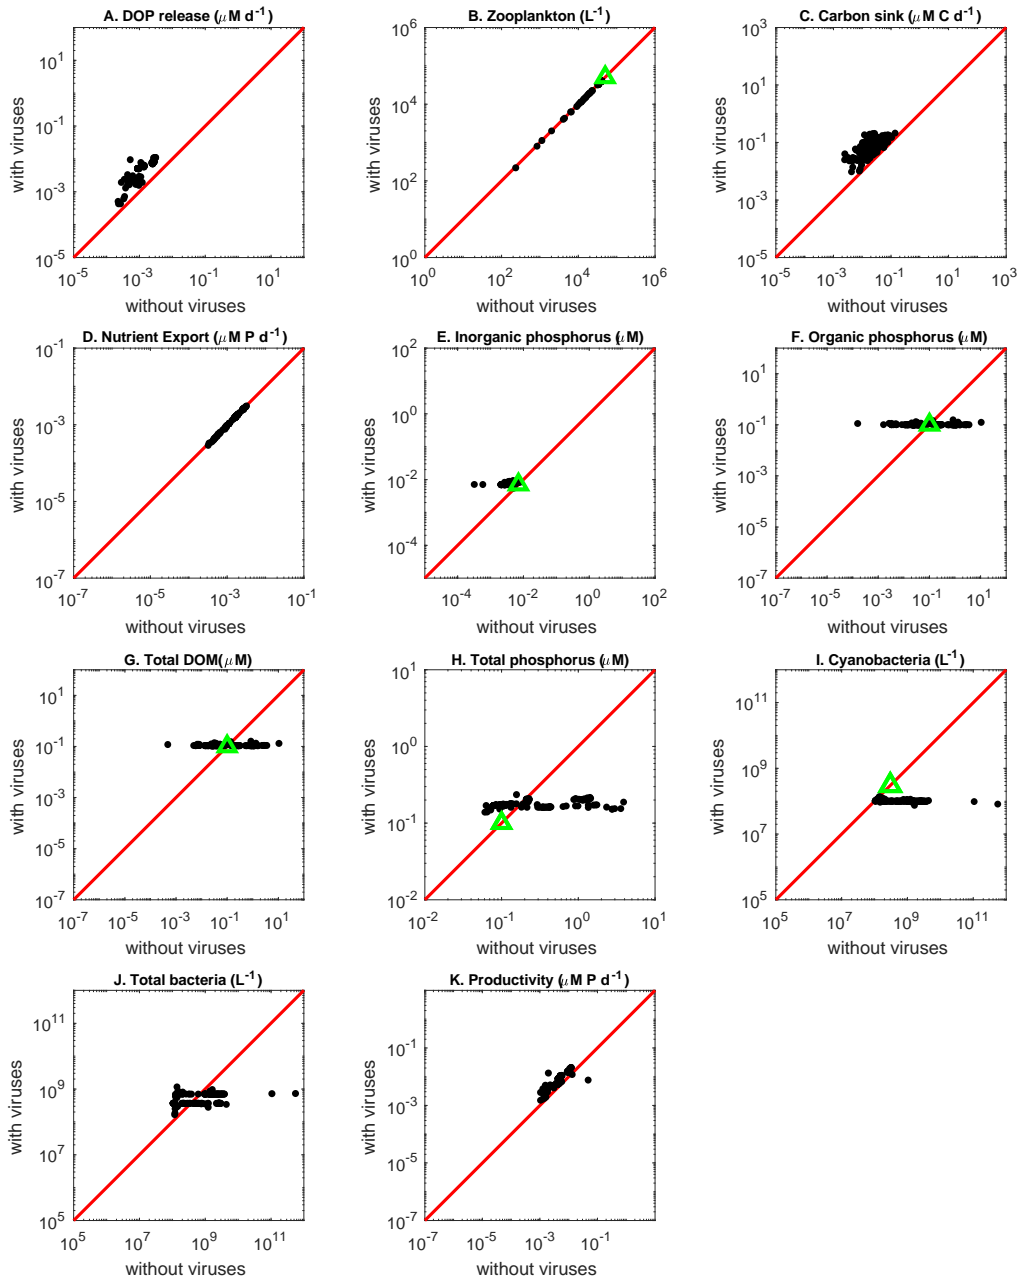

Figure D1. Effect of viruses on steady-state concentrations and fluxes for the phosphorus-limited system when heterotrophic bacteria are not represented in the virus-free system, but only cyanobacteria. The red line denotes the 1:1 line and the green triangles show target densities used in the optimization procedure. Each point stands for the steady concentration for one optimized parameter set. Points above and below the red line represent steady-state values that increased and decreased after introducing viruses respectively.
